# Supplementary material for: Polymeric Nanocapsule Enhances the Peroxidase-like Activity of Fe3O4 Nanozyme for Removing Organic Dyes
Source: MDPI journal article supplement (doi:10.3390/catal12060614), 2022-06-03
Supplement: s1 [file s1]

# **Polymeric nanocapsule enhances the peroxidase-like activity of Fe<sub>3</sub>O<sub>4</sub> nanozyme for removing organic dyes**

Junqi Zha<sup>1#</sup>, Wugao Wu<sup>1#</sup>, Peng Xie<sup>1</sup>, Honghua Han<sup>1</sup>, Zheng Fang<sup>2\*</sup>, Yantao Chen<sup>1\*</sup> and Zhongfan Jia<sup>3\*</sup>

<sup>1</sup>*Shenzhen Key Laboratory of Environmental Chemistry and Ecological Remediation, College of Chemistry and Environmental Engineering, Shenzhen University, Guangdong, 518060, China*

<sup>2</sup> *School of Materials Science and Engineering, State Key Laboratory of New Textile Materials & Advanced Processing Technology, Wuhan Textile University, Wuhan 430200, PR China*

<sup>3</sup> *Institute for Nanoscale Science and Technology, College of Science and Engineering, Flinders University, Bedford Park, South Australia 5042, Australia*

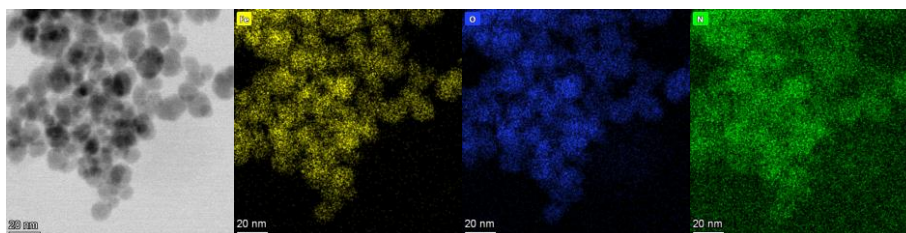

**Figure S1.** The corresponding elemental mapping pattern of the dried  $\text{Fe}_3\text{O}_4@\text{Gel}$ .

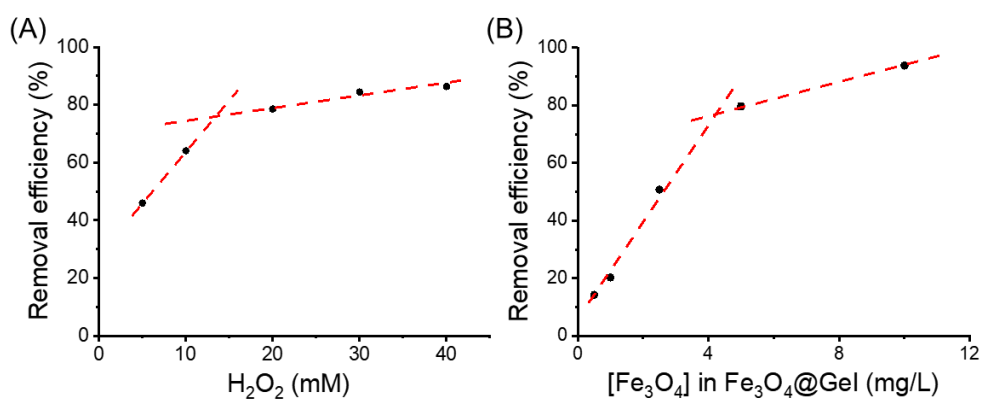

**Figure S2.** Influence of various initial parameters on the  $\text{Fe}_3\text{O}_4@\text{Gel}$ -mediated oxidation of dye pollutant: (A)  $\text{H}_2\text{O}_2$  dosage and (B)  $\text{Fe}_3\text{O}_4$  loading in the sample  $\text{Fe}_3\text{O}_4@\text{Gel}$ . The elapsed reaction times were set as 180 min. Reaction conditions:  $[\text{H}_2\text{O}_2]_0 = 20$  mM,  $[\text{Fe}_3\text{O}_4] = 5$  mg/L,  $[\text{IC}]_0 = 200$  mg/L, pH = 7, and  $T = 30$  °C.

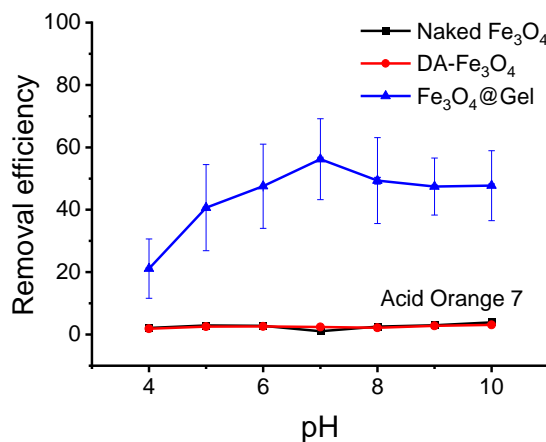

**Figure S3.** Influence of pH on the Fe<sub>3</sub>O<sub>4</sub>@Gel-mediated oxidation of dye pollutant. The reaction parameters were as following: [Na<sub>2</sub>S<sub>2</sub>O<sub>8</sub>]<sub>0</sub> = 5 mM, [Fe<sub>3</sub>O<sub>4</sub>] = 2.5 mg/L, [AO7]<sub>0</sub> = 100 mg/L, and *T* = 30 °C.

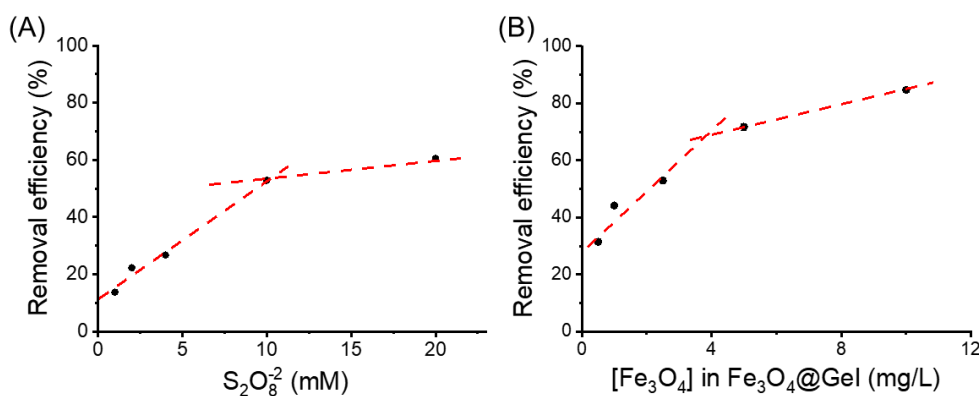

**Figure S4.** Influence of various initial parameters on the Fe<sub>3</sub>O<sub>4</sub>@Gel-mediated oxidation of dye pollutant: (A) Na<sub>2</sub>S<sub>2</sub>O<sub>8</sub> dosage, (B) Fe<sub>3</sub>O<sub>4</sub> loading in the sample Fe<sub>3</sub>O<sub>4</sub>@Gel. Except for the investigated parameter, other parameters were fixed as following: [Na<sub>2</sub>S<sub>2</sub>O<sub>8</sub>] = 10 mM, [Fe<sub>3</sub>O<sub>4</sub>] = 5.0 mg/L, [AO7]<sub>0</sub> = 100 mg/L, pH = 7.0, and *T* = 30 °C.

Table S1. A comparison of catalysis performance between this work and literature that used similar catalysis systems.

| Catalysts                                        | Reaction conditions                                                                                                                                                                                                   | Removal efficiency | References |
|--------------------------------------------------|-----------------------------------------------------------------------------------------------------------------------------------------------------------------------------------------------------------------------|--------------------|------------|
| Fe <sub>3</sub> O <sub>4</sub> @Gel              | Catalysts =[Fe <sub>3</sub> O <sub>4</sub> @Gel] = 112 mg L <sup>-1</sup> , [Fe <sub>3</sub> O <sub>4</sub> ] = 5 mg L <sup>-1</sup> , H <sub>2</sub> O <sub>2</sub> = 20mM, IC=200 mg L <sup>-1</sup> , pH=7, T=30°C | 99%                | This work  |
| FeS                                              | Catalysts =350 mg L <sup>-1</sup> , Na <sub>2</sub> S <sub>2</sub> O <sub>8</sub> =4mM, PCA=0.2mM, pH = 3-11,                                                                                                         | 98%                | [8]        |
| CuFe <sub>2</sub> O <sub>4</sub>                 | Catalysts =200mg L <sup>-1</sup> , PMS= 0.1mM, As(III)=1.415mg L <sup>-1</sup> , pH=3.1-6.8, T=10-40°C                                                                                                                | 100%               | [9]        |
| AMnTi                                            | Catalysts =200mg L <sup>-1</sup> , PMS= 0.2mM, CBZ=5μmol L <sup>-1</sup> , pH=5, T=25°C                                                                                                                               | 100%               | [11]       |
| CuO-Fe <sub>3</sub> O <sub>4</sub>               | Catalysts =300mg L <sup>-1</sup> , Na <sub>2</sub> S <sub>2</sub> O <sub>8</sub> = 5mM, Phenol=0.1mM, pH=5.6,                                                                                                         | 44%                | [13]       |
| Fe <sub>3</sub> O <sub>4</sub> @GSH              | Catalysts =2000mg L <sup>-1</sup> , H <sub>2</sub> O <sub>2</sub> = 5mM, 2,4-DCP=100mg L <sup>-1</sup> , pH=6.5, T=30°C                                                                                               | 99%                | [14]       |
| Fe <sub>3</sub> O <sub>4</sub>                   | Catalysts =400mg L <sup>-1</sup> , Ultrasound+PMS=3mM, AO7=0.06 mM, T=25°C                                                                                                                                            | 90%                | [15]       |
| H <sub>2</sub> A/Fe <sub>3</sub> O <sub>4</sub>  | Catalysts =400mg L <sup>-1</sup> , Na <sub>2</sub> S <sub>2</sub> O <sub>8</sub> =30mM, 2,4-DCP=100mg L <sup>-1</sup> , pH = 3, T=25°C                                                                                | 98.5%              | [16]       |
| FeO (I)                                          | Catalysts = 300 mg L <sup>-1</sup> , H <sub>2</sub> O <sub>2</sub> = 0.04%, Rhodamine-B = 25pm                                                                                                                        | 93%                | [40]       |
| Fe <sub>3</sub> O <sub>4</sub> MNPs              | Catalysts = 800 mg L <sup>-1</sup> , PMS= 0.2mM, APAP= 10 mg L <sup>-1</sup> , pH = 4.3,                                                                                                                              | 98.1%              | [28]       |
| Fe <sub>3</sub> O <sub>4</sub> @MnO <sub>2</sub> | Catalysts = 300 mg L <sup>-1</sup> , H <sub>2</sub> O <sub>2</sub> =1%, MB=40 mg/L , pH 4-9                                                                                                                           | 99.0%              | [41]       |
| Fe <sub>3</sub> O <sub>4</sub> @MOF-5            | Catalysts = 1000mg L <sup>-1</sup> , H <sub>2</sub> O <sub>2</sub> = 30 mM, MB=50 mg L <sup>-1</sup> , pH= 4, T = 30 °C                                                                                               | 100%               | [42]       |
| Fe <sub>3</sub> O <sub>4</sub> /CeO <sub>2</sub> | Catalysts = 1000mg L <sup>-1</sup> , H <sub>2</sub> O <sub>2</sub> = 163.7 mM, MB = 100 mg L <sup>-1</sup> , pH= 4, T = 35 °C                                                                                         | 100%               | [43]       |
| Fe <sub>3</sub> O <sub>4</sub> /Carbon           | Catalysts = 800mg L <sup>-1</sup> , H <sub>2</sub> O <sub>2</sub> = 90 mM, MB = 10 mg L <sup>-1</sup> , PH= 3, T = 30 °C                                                                                              | 100%               | [44]       |
